# Supplementary material for: Hydrothermal formation of graphene aerogel for oil sorption: the role of reducing agent, reaction time and temperature
Source: Royal Society of Chemistry journal article supplement (doi:10.1039/c5nj03086b), 2016-01-01
Supplement: c5nj03086b6.pdf [file c5nj03086b6.pdf]

Supporting Information (New Journal of Chemistry)

**Hydrothermal formation of graphene aerogel for oil sorption: the role of reducing agent, reaction time and temperature**

Wenchao Wan,<sup>a,b</sup> Fei Zhang,<sup>b</sup> Shan Yu,<sup>b</sup> Ruiyang Zhang,<sup>b</sup> and Ying Zhou <sup>a,b\*</sup>

a) State Key Laboratory of Oil and Gas Reservoir and Exploitation, Southwest Petroleum University, Chengdu 610500, China

b) The Center of New Energy Materials and Technology, School of Materials and Engineering, . Southwest Petroleum University, Chengdu 610500, China

\*To whom correspondence should be addressed

Email: [yzhou@swpu.edu.cn](mailto:yzhou@swpu.edu.cn) (Y. Zhou)

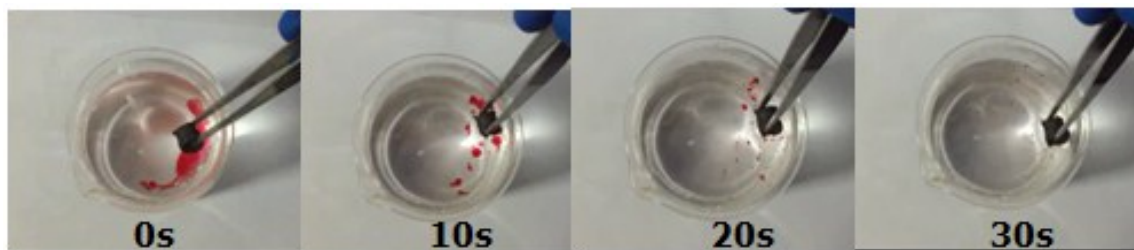

**Fig. S1** The oil-water separation process of toluene (stained with Sudan red) from water by the GA reduced with VC.

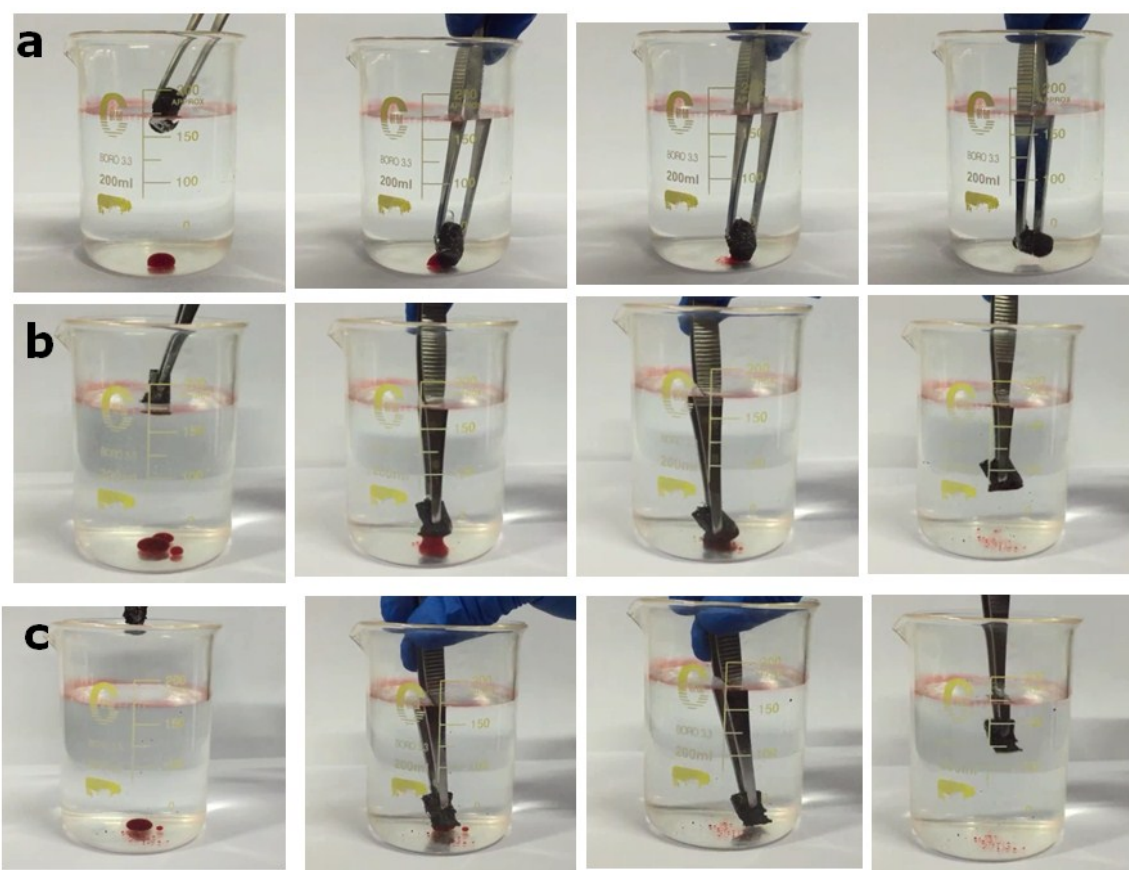

**Fig. S2** The process of the oil-water separation test under the water over the GAs reduced by (a) VC, (b) EDA and (c) ammonia with the chloroform stained by Sudan red.

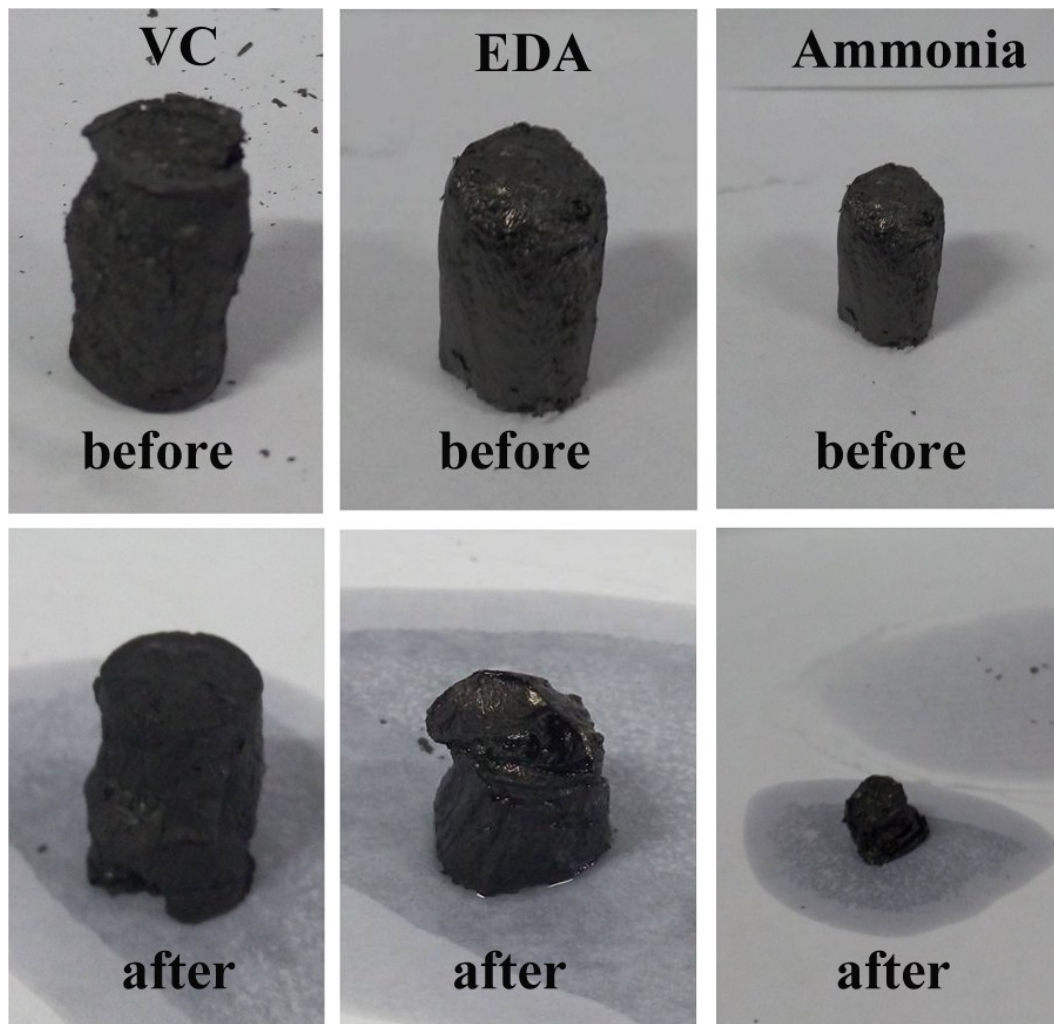

**Fig. S3** Photographs of three kinds of GAs before and after the adsorption-squeezing experiments.

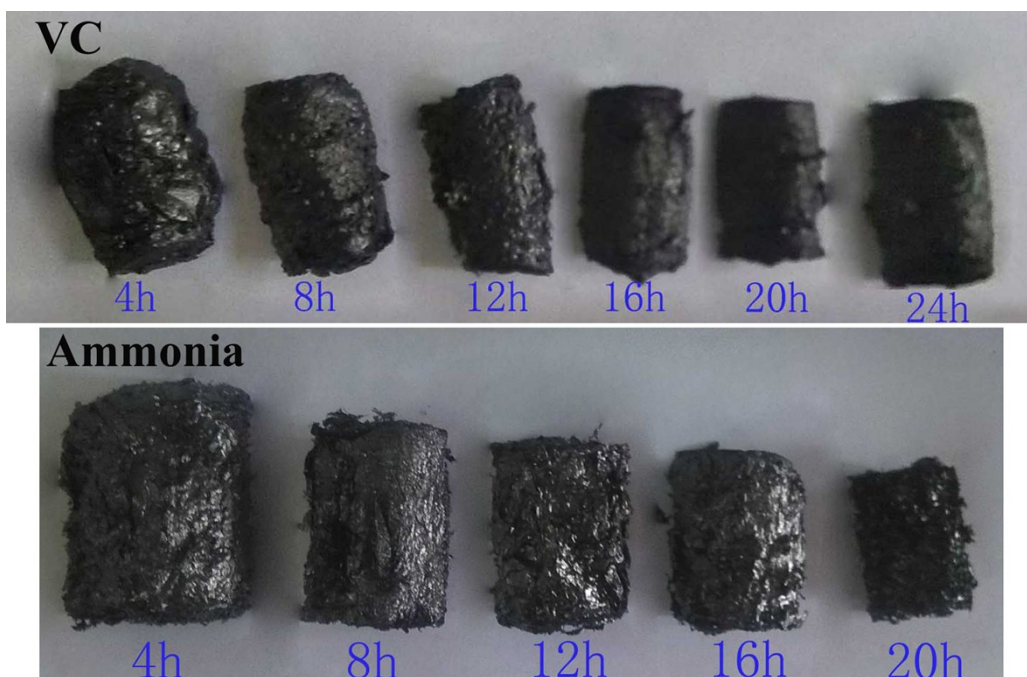

**Fig. S4** Photographs of the GAs prepared with vc (up) and ammonia (down) for different reaction times.

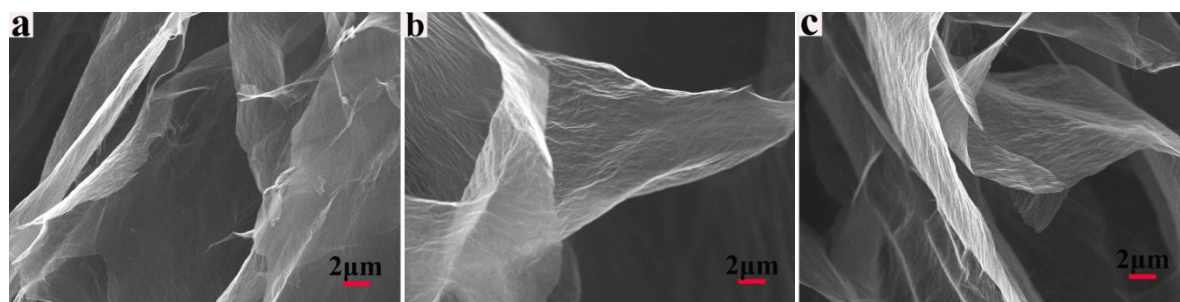

**Fig. S5** SEM images of GAs reduced with EDA for (a) 6 h, (b) 12 h and (c) 24 h at 120°C

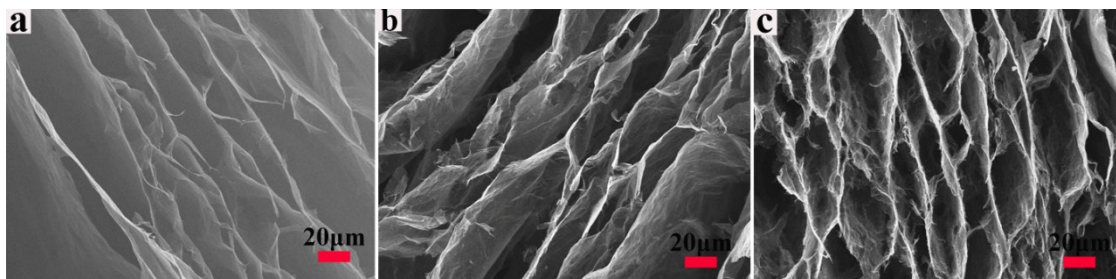

**Fig. S6** SEM images of the GAs reduced for 6 h with ammonia at the temperatures of (a) 120 °C, (b) 150 °C and (c) 180 °C.

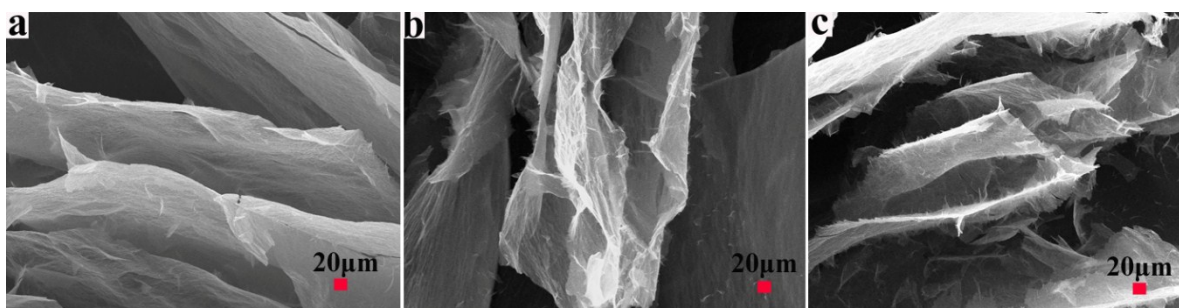

**Fig. S7** SEM of GAs reduced with EDA at the temperatures of 90 °C, 120 °C and 180 °C

**Table S1** The elemental composition of GAs prepared by various reducing agents.

|         | N (wt. %) | C (wt.%) | S (wt%) |
|---------|-----------|----------|---------|
| VC      | 0.52      | 64.72    | 0.05    |
| EDA     | 8.79      | 65.47    | 0.03    |
| ammonia | 8.48      | 64.47    | 0.09    |

**Table S2** The density and viscosity of the involved solvents in this work

|            | Density (g/cm <sup>3</sup> ) | Viscosity (m • pas) |
|------------|------------------------------|---------------------|
| lube       | 0.89                         | 9.9                 |
| n-hexane   | 0.66                         | 0.307               |
| water      | 1                            | 0.89                |
| chloroform | 1.5                          | 0.325               |
| toluene    | 0.866                        | 0.5866              |
